# Supplementary material for: Feasibility of Utilizing Stable-Isotope Dimethyl Labeling in Liquid Chromatography–Tandem Mass Spectrometry-Based Determination for Food Allergens—Case of Kiwifruit
Source: Molecules. 2019 May 18;24(10):1920. doi: 10.3390/molecules24101920 (PMC6571768; doi:10.3390/molecules24101920)

**Supplementary Table S1.** Identified allergens of the kiwi extracts.

| Protein ID | IUIS name | Protein name                          | MASCOT score | Coverage |
|------------|-----------|---------------------------------------|--------------|----------|
| P00758     | Act d 1   | Actinidian                            | 1577         | 47.9     |
| P81370     | Act d 2   | Thaumatococcus-like protein           | 906          | 60.9     |
| Q6TPK4     | Act d 4   | Cysteine proteinase inhibitor 1       | 287          | 71.4     |
| P84527     | Act d 5   | Kiwelin                               | 1469         | 42.7     |
| P83326     | Act d 6   | Pectinesterase inhibitor              | 511          | 26.2     |
| P85076     | Act d 7   | Pectinesterase                        | 320          | 14.1     |
| P86137     | Act d 10  | Non-specific lipid-transfer protein 1 | 41           | 14.1     |
| P85524     | Act d 11  | Kirola                                | 437          | 58.7     |

**Supplementary Table S2.** BLAST results of candidate peptides with 100% identity and 100% query coverage

| Protein  | Peptide sequence   | Protein in non- <i>Actinidia</i> species (species)        | Protein ID |
|----------|--------------------|-----------------------------------------------------------|------------|
| Act d 1  | SAGAVVDIK          | — <sup>a</sup>                                            | —          |
| Act d 5  | NNIVDGSNAVWSALGLDK | —                                                         | —          |
|          | IVALSTGWYNGGSR     | Ripening-related protein grip22 ( <i>Vitis vinifera</i> ) | Q9M4H4     |
|          |                    | Uncharacterized protein ( <i>Citrus unshiu</i> )          | A0A2H5Q537 |
|          |                    | Uncharacterized protein ( <i>Vitis vinifera</i> )         | F6GU22     |
|          |                    | Grip22-like protein ( <i>Vitis quinquangularis</i> )      | A0A163HAW5 |
|          |                    | Uncharacterized protein ( <i>Cucumis sativus</i> )        | A0A0A0KBF2 |
|          |                    | Uncharacterized protein ( <i>Cucumis sativus</i> )        | A0A0A0KGH1 |
|          |                    | Kiwellin-like ( <i>Cucumis melo</i> )                     | A0A1S3CI58 |
|          |                    | Uncharacterized protein ( <i>Citrus clementina</i> )      | V4SG37     |
|          |                    | Ripening-related protein ( <i>Siraitia grosvenorii</i> )  | K7NBR3     |
|          |                    | Uncharacterized protein ( <i>Gossypium barbadense</i> )   | A0A2P5Q249 |
|          |                    | Uncharacterized protein ( <i>Cucumis sativus</i> )        | A0A0A0KDC3 |
|          |                    | Kiwellin-like ( <i>Gossypium hirsutum</i> )               | A0A1U8J808 |
|          |                    | kiwellin-like ( <i>Cucumis melo</i> )                     | A0A1S3CNR1 |
|          |                    | Uncharacterized protein ( <i>Cucumis sativus</i> )        | A0A0A0K532 |
| Act d 11 | GEHNSVTWTFHYEK     | —                                                         | —          |

<sup>a</sup>The query peptide matched to no proteins with 100% identity and 100% coverage after the BLAST search

**Supplementary Fig S1.** Mass spectra of (A) SPA5-H, (B) SPA5-D, (C) SPA11-H and (D) SPA11-D. The dotted line represented the m/z of native signature peptides (SPA5 and SPA11) and  $\Delta m/z$  showed the m/z shift of the signature peptide before and after stable-isotope dimethyl labeling.

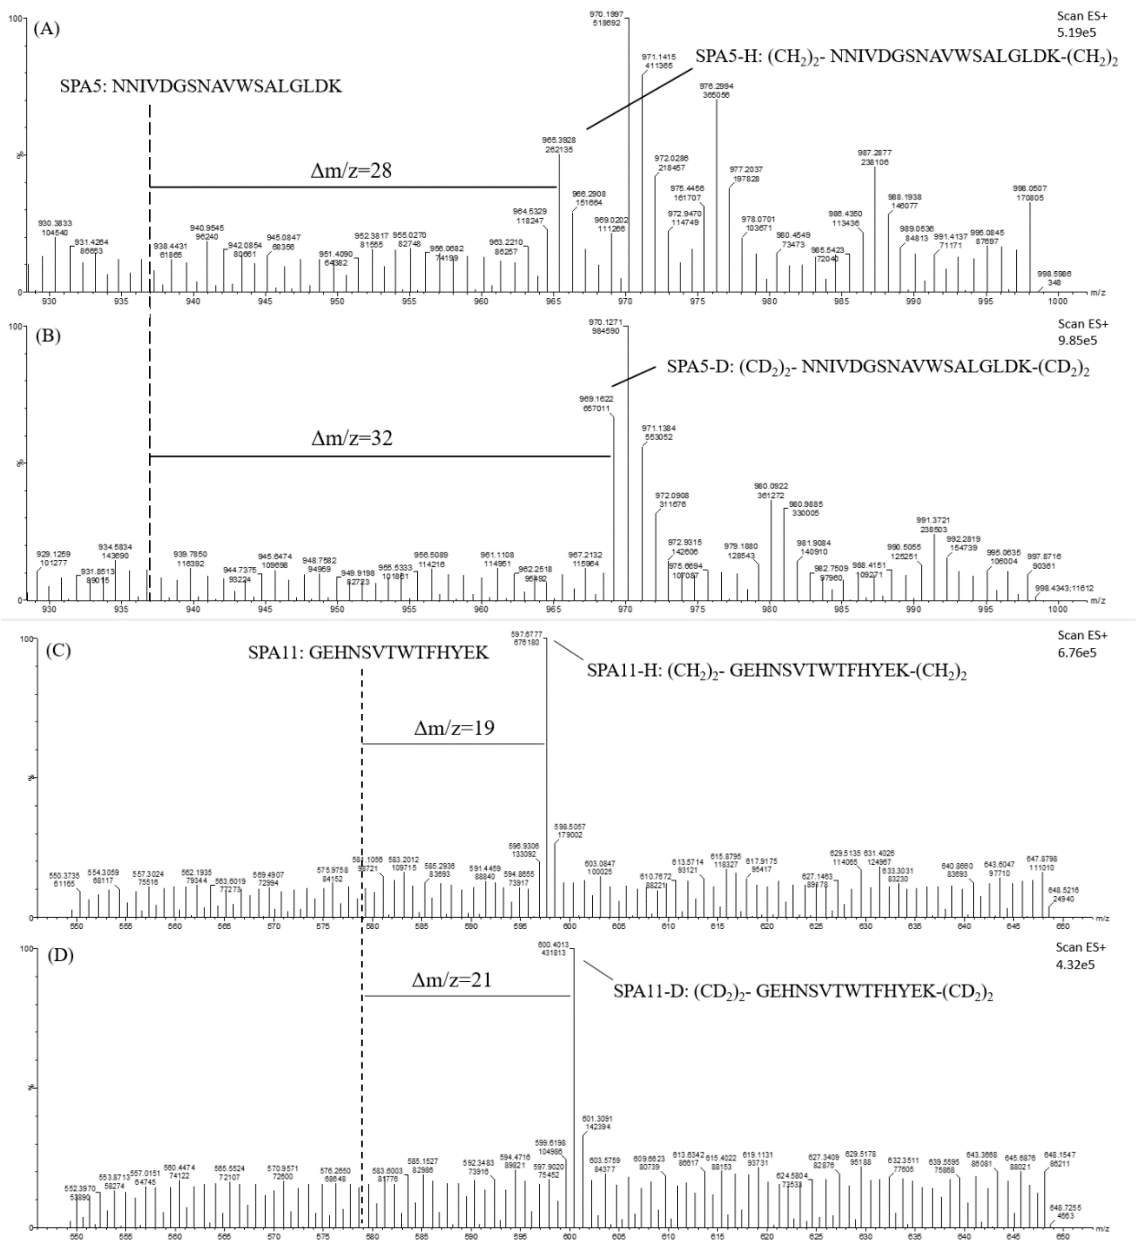

**Supplementary Fig. S2** MRM chromatograms of (A) SPA5-H ( $1 \mu\text{g mL}^{-1}$ ), (B) SPA5-D ( $500 \text{ ng mL}^{-1}$ ), (C) SPA11-H ( $1 \mu\text{g mL}^{-1}$ ), and (D) SPA11-D ( $500 \text{ ng mL}^{-1}$ ) for the mixture of peptide standards and (E) SPA5-H ( $568.2 \mu\text{g mL}^{-1}$ ), (F) SPA5-D ( $500 \text{ ng mL}^{-1}$ ), (G) SPA11-H (no peak detected), and (H) SPA11-D ( $500 \text{ ng mL}^{-1}$ ) for kiwifruit raw extract sample.

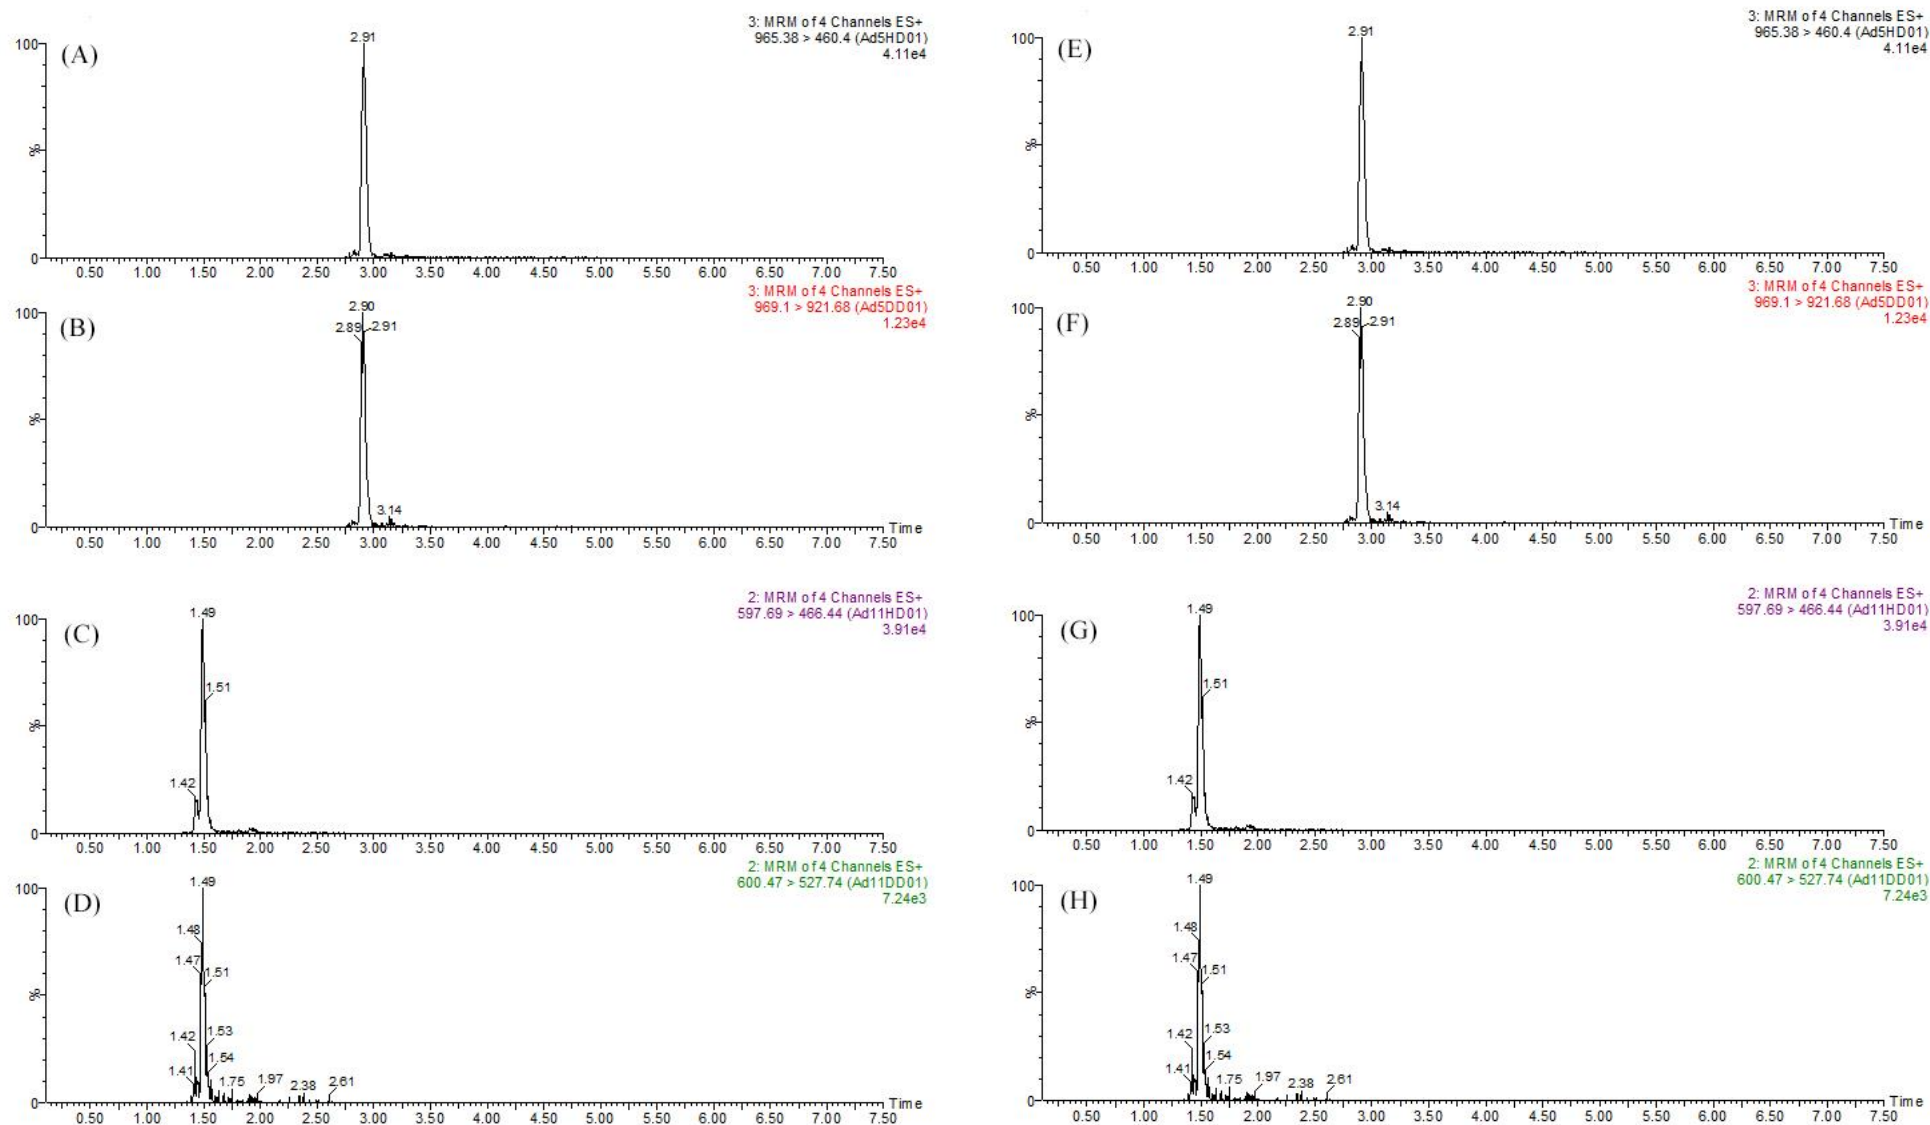

**Supplementary Fig. S3** Comparison of phenol extraction efficiency.

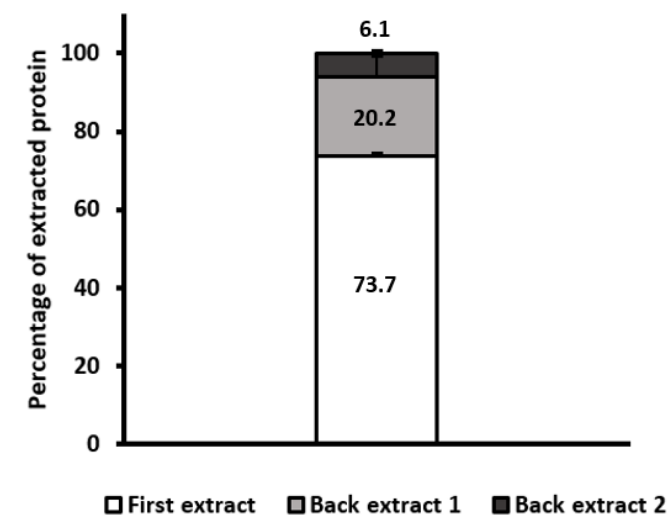

**Supplementary Fig. S4** Comparison of the extraction efficiency of phenol method from reference and the modified phenol method.

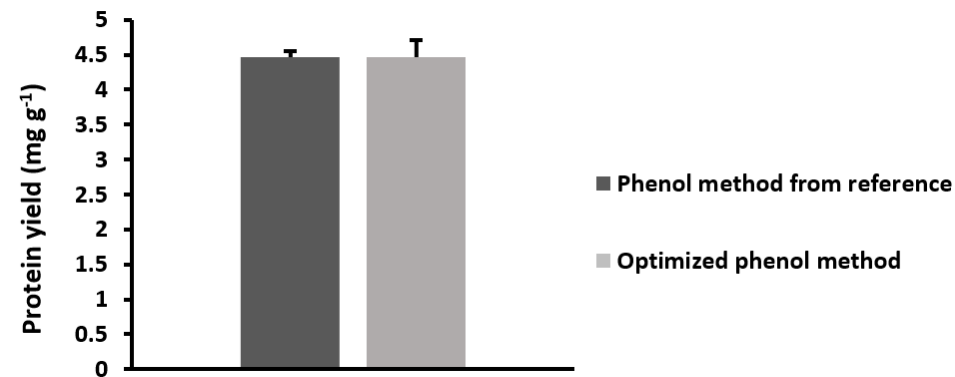

Supplement: Supplementary file 1 [file molecules-24-01920-s001.pdf]
